# Supplementary material
Source: MDPI journal article supplement (https://www.mdpi.com/2072-4292/8/4/340)
Supplement: s1 [file s1]

# Supplementary Materials: A Combined Satellite-Derived Drought Indicator to Support Humanitarian Aid Organizations

Markus Enenkel, Caroline Steiner, C, Thomas Mistelbauer, Wouter Dorigo, Wolfgang Wagner, Linda See, Clement Atzberger, Stefan Schneider and Edith Rogenhofer

**Table S1.** Input Variables for the Enhanced Combined Drought Index.

| Input Variable                                      | Dataset Provider                                          | Temporal/Spatial Coverage                                     | Temporal/Spatial Resolution      | Comment/URL                                                                                                                                                   |
|-----------------------------------------------------|-----------------------------------------------------------|---------------------------------------------------------------|----------------------------------|---------------------------------------------------------------------------------------------------------------------------------------------------------------|
| Rainfall                                            | TAMSAT                                                    | 1983-present/Africa                                           | Daily/0.0375° (approx. 4 km)     | <a href="http://www.met.reading.ac.uk/~tamsat/about/">http://www.met.reading.ac.uk/~tamsat/about/</a>                                                         |
| ESA CCI SM (Historic Soil Moisture Reference)       | ESA Climate Change Initiative/TU Wien                     | 1978-2013/global (only 1992 to present used due to data gaps) | Daily/0.25° (approx. 28 km)      | Global dataset including observations from radars and radiometers ( <a href="http://www.esa-soilmoisture-cci.org/">http://www.esa-soilmoisture-cci.org/</a> ) |
| CCI NRT (Near-real-time continuation of ESA CCI SM) | TU Wien (Department of Geodesy and Geo-information)       | 2013-present                                                  | Daily/0.25° (approx. 28 km)      | ESA CCI processing chain adapted to include NRT observations of ASCAT on MetOP A/B and AMSR-2 und GCOM-W                                                      |
| Land Surface Temperature (MODIS)                    | NASA                                                      | 2000-present/global                                           | Daily/ Max. 0.1° (approx. 11 km) | <a href="http://neo.sci.gsfc.nasa.gov/">http://neo.sci.gsfc.nasa.gov/</a>                                                                                     |
| Vegetation Status (NDVI) (MODIS)                    | University of Natural Resources and Life Sciences, Vienna | 2002-present/global                                           | daily/250 m                      | <a href="http://ivfl-info.boku.ac.at/index.php/eo-data-processing">http://ivfl-info.boku.ac.at/index.php/eo-data-processing</a>                               |

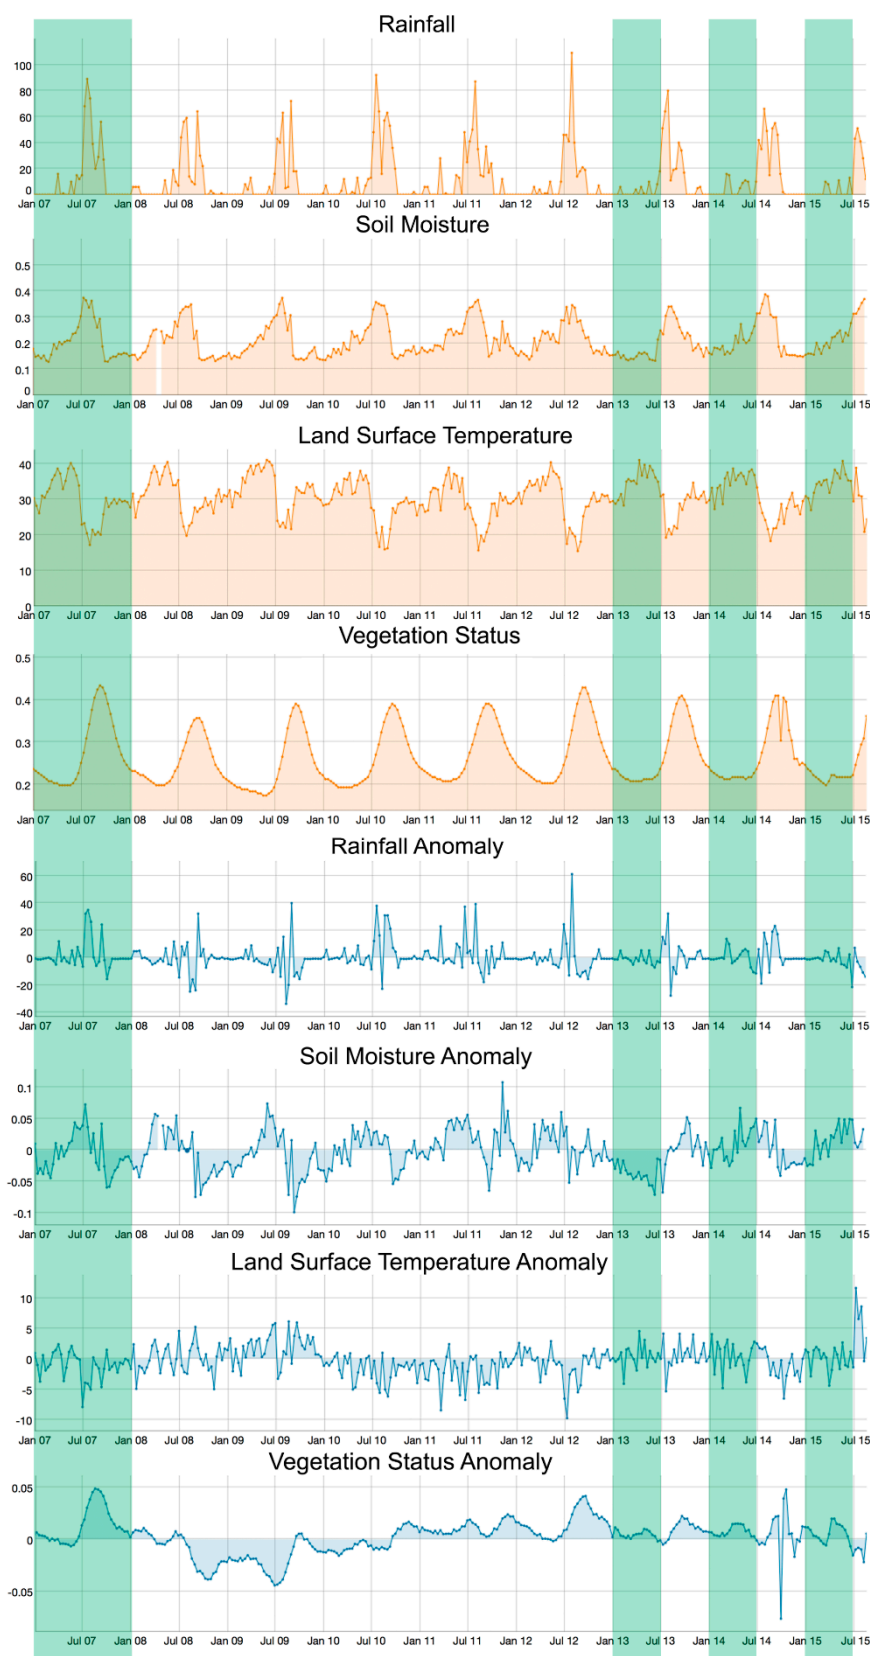

**Figure S13.** Time series for all raw data and corresponding anomalies that are currently processed by POETS; The time series cover 2007 to mid 2015 for the regions of Atsbi and Kinte Awelo; Report drought conditions are highlighted in green.

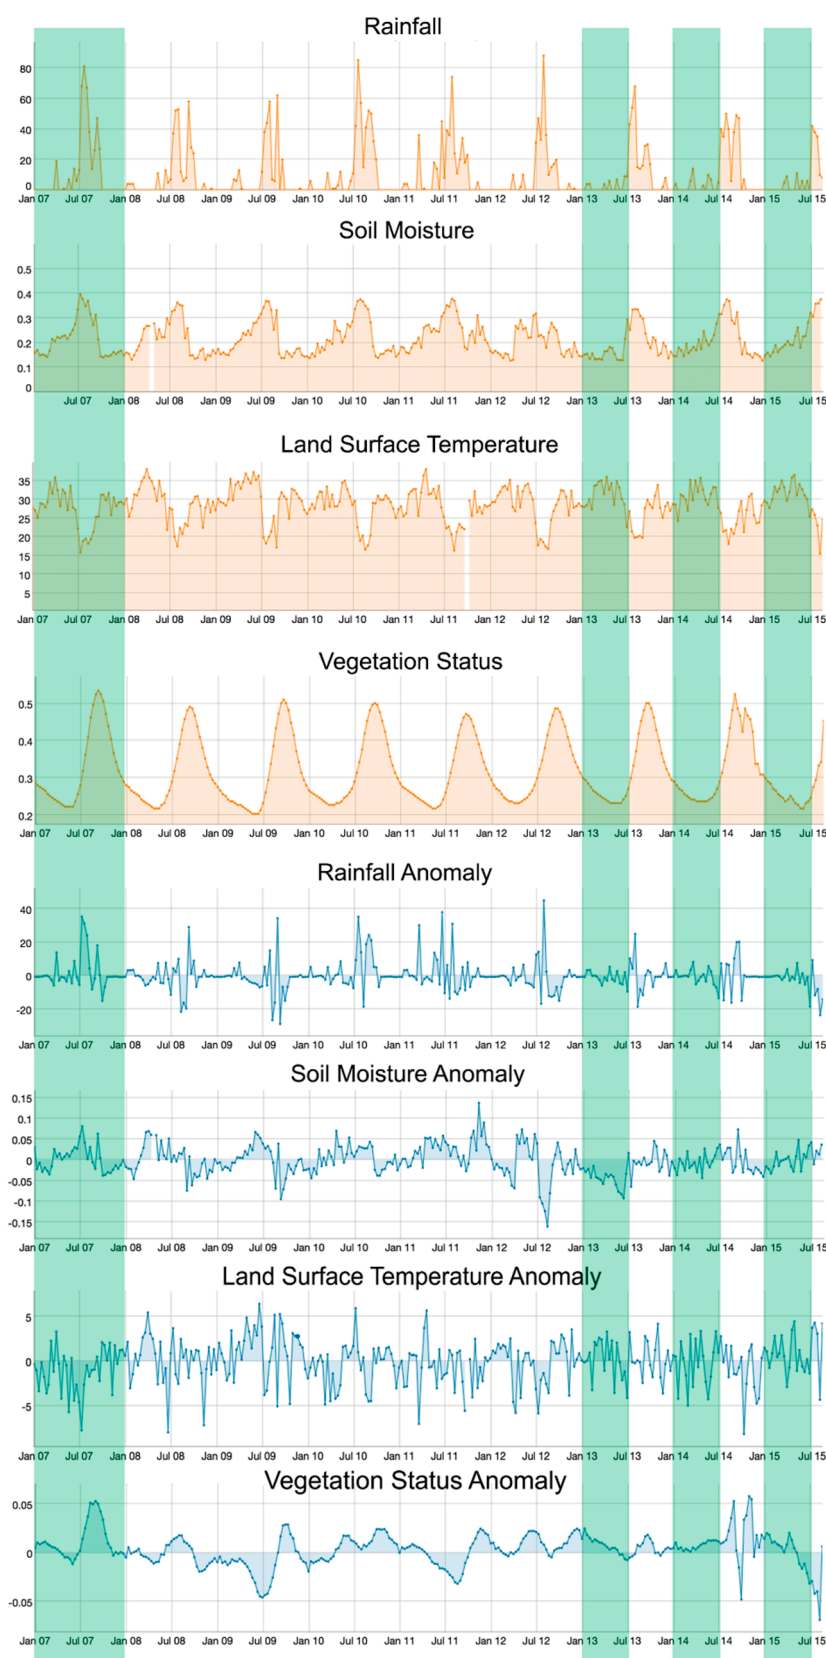

**Figure S14.** Time series for all raw data and corresponding anomalies that are currently processed by POETS; The time series cover 2007 to mid 2015 for the region of Saesi Daesdaemba; Report drought conditions are highlighted in green.

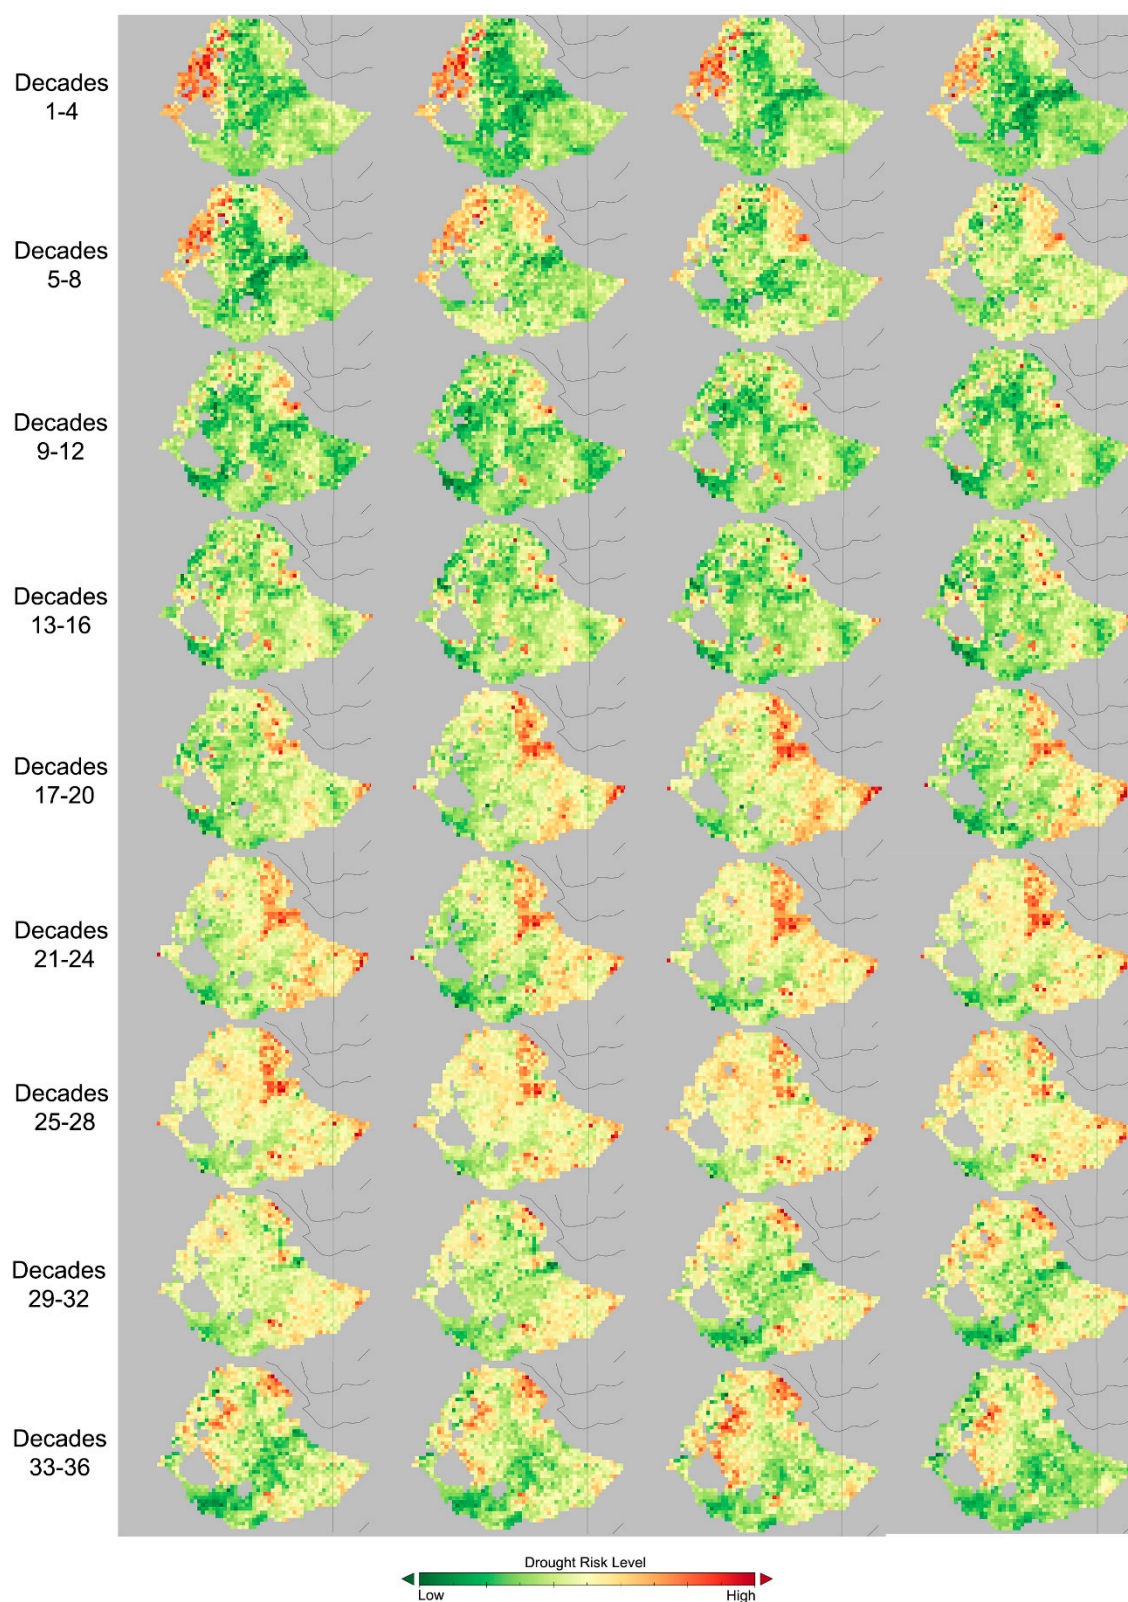

**Figure S15.** ECDI-based Drought Risk Level for all decades of 2007; Maximum warning level: 3.4 (decade 1).

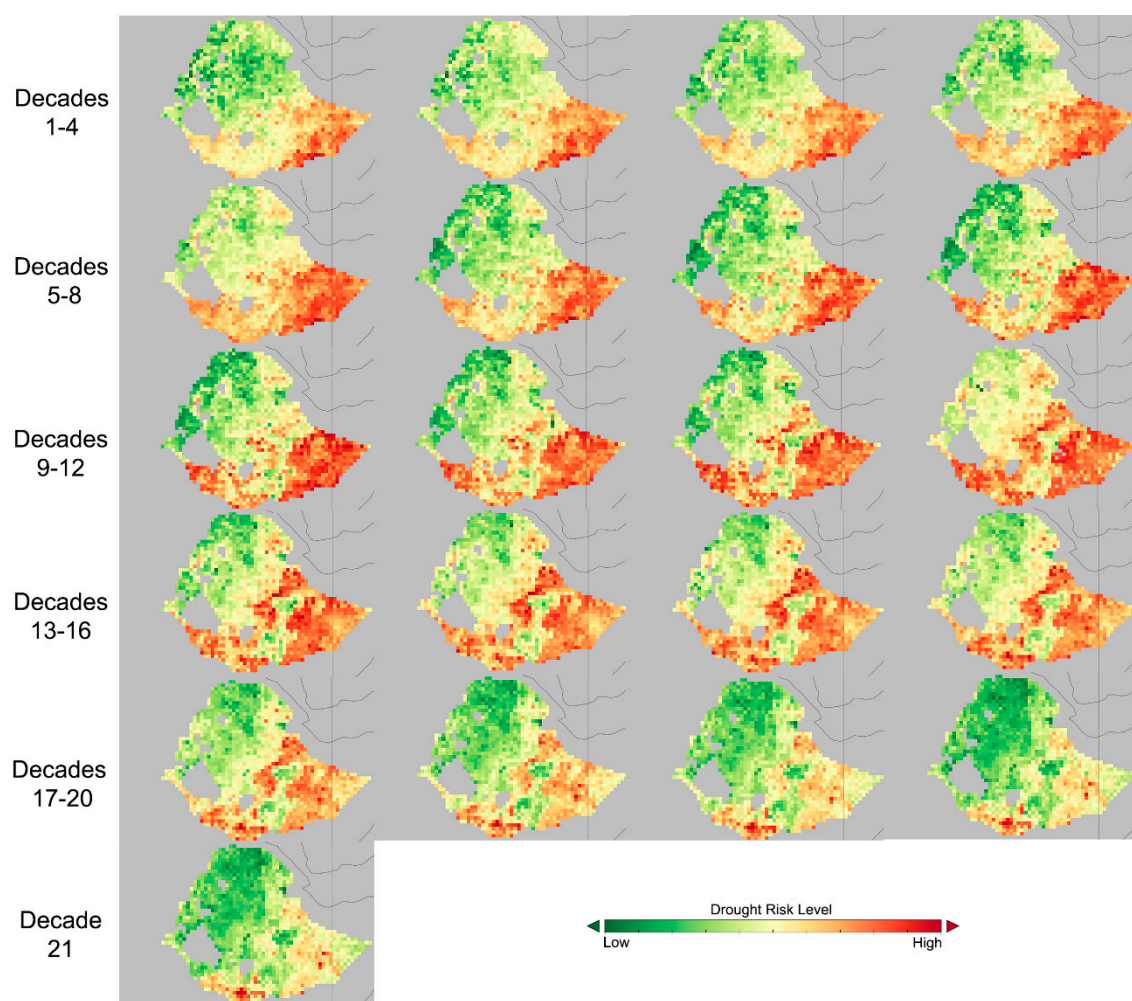

**Figure S16.** ECDI-based Drought Risk Level for the first 21 decades (seven months) of 2011; July is included, because famine was officially declared on 20 July; Maximum warning level: 3.5 (decade 20, 10–20 July 2011).

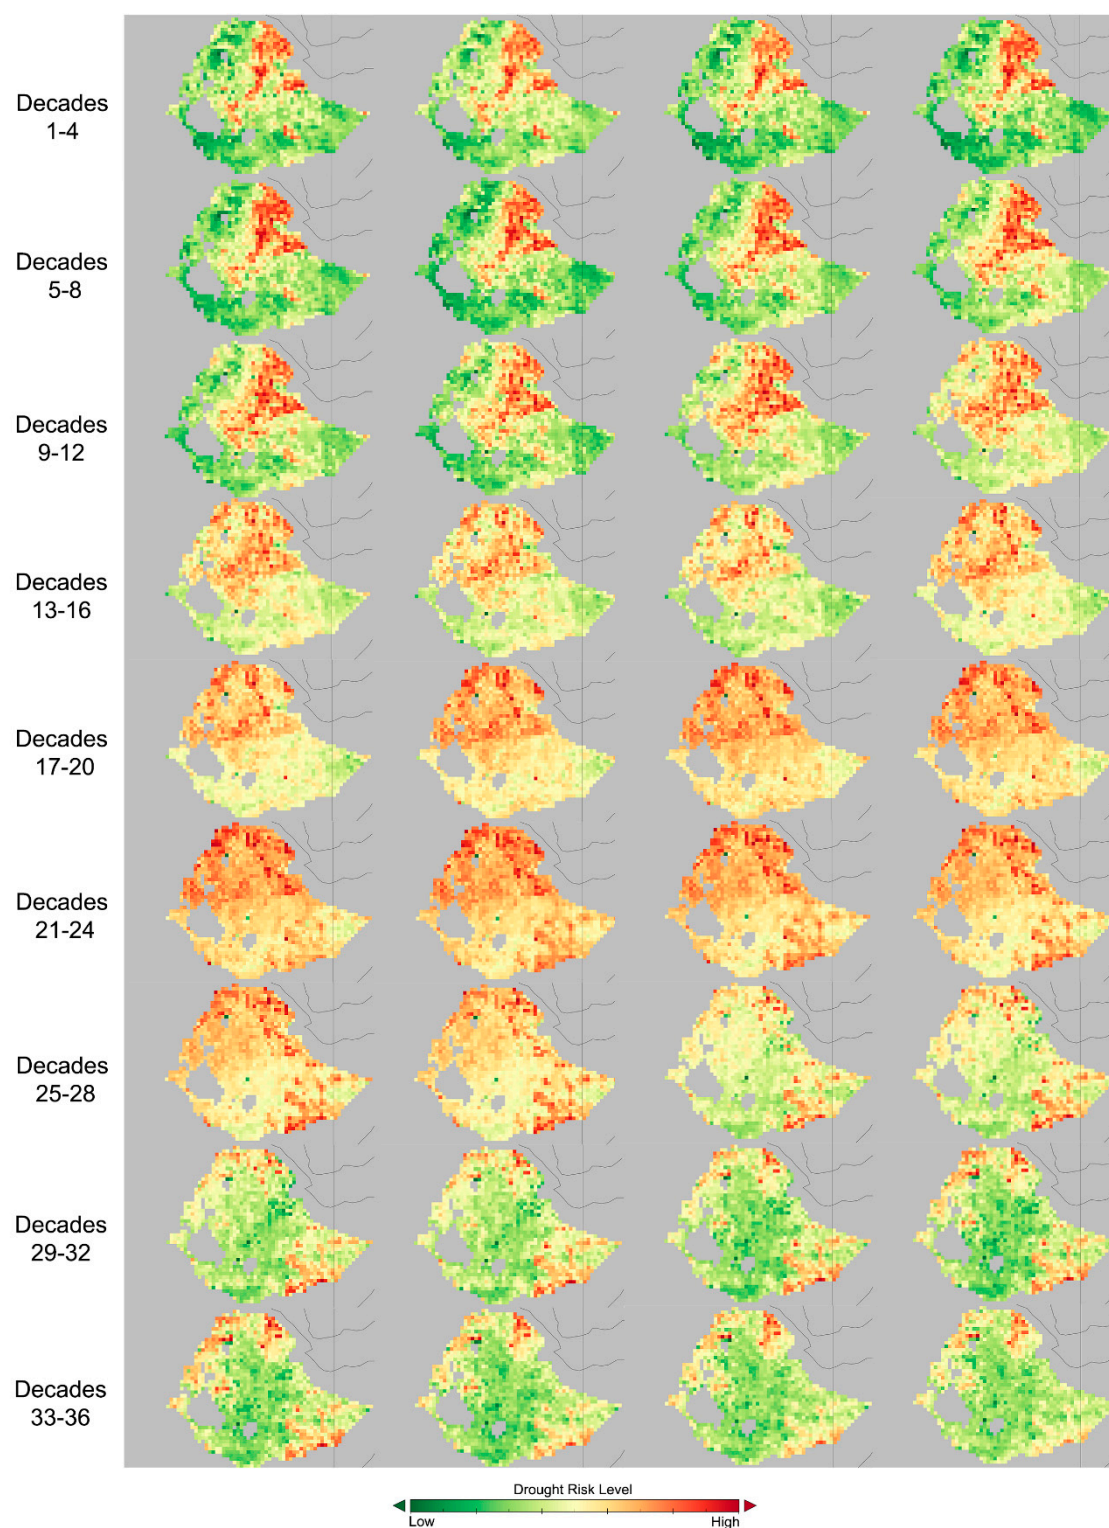

**Figure S17.** ECDI-based Drought Risk Level for all decades of 2013; Maximum warning level 3.5 (decades 3–6, late January to late February 2013).

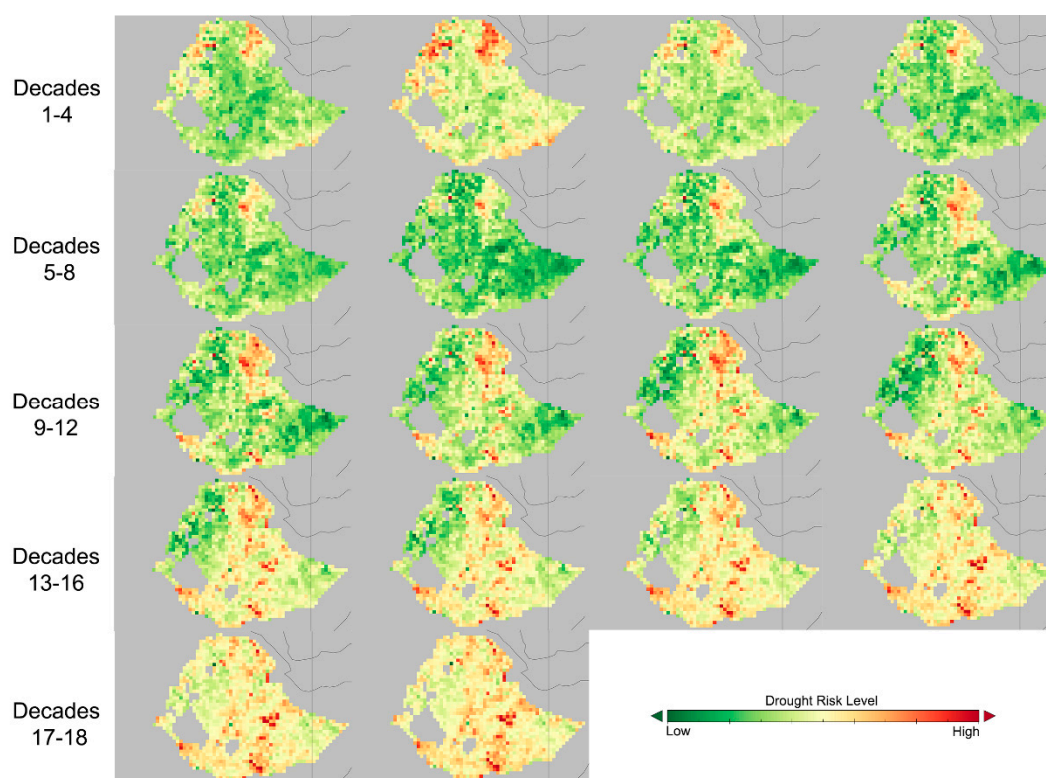

**Figure S18.** ECDI-based Drought Risk Level for the first 18 decades (six months) of 2014; Maximum warning level: 2.9 (decade 1 and 3–6, early January and late January to late February).

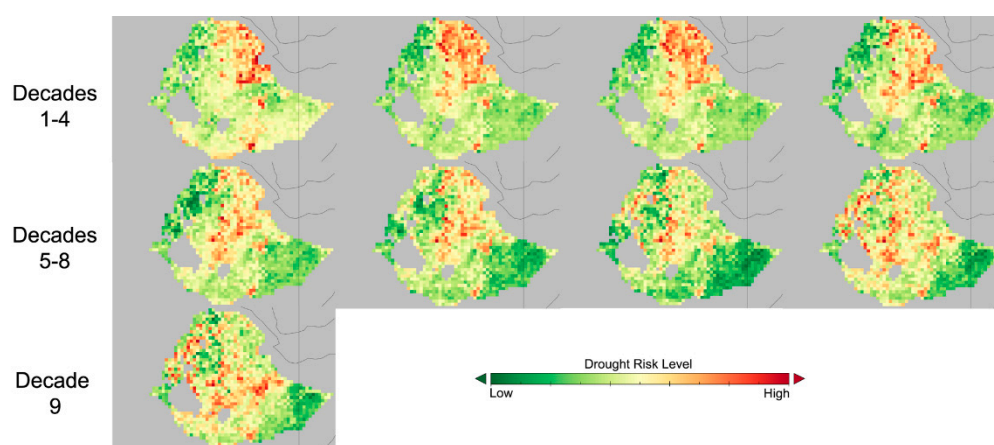

**Figure S19.** ECDI-based Drought Risk Level for the first 9 decades (three months) of 2015; Maximum warning level: 3.5 (decades 7 and 9, early and late March).
